1 *In vivo* analysis of *Trypanosoma cruzi* persistence foci at single cell resolution

2

3 Alexander I. Ward,<sup>a</sup> Michael D. Lewis,<sup>a</sup> Archie Khan,<sup>a</sup> Conor J. McCann,<sup>b</sup> Amanda F.

4 Francisco,<sup>a</sup> Shiromani Jayawardhana,<sup>a</sup> Martin C. Taylor,<sup>a</sup> John M. Kelly<sup>a#</sup>

5

6 <sup>a</sup>Department of Infection Biology, London School of Hygiene and Tropical Medicine,

7 London, UK

8

9 <sup>b</sup>Stem Cells and Regenerative Medicine, Great Ormond Street Institute of Child

10 Health, University College London, London, UK

11

12 Running Head: Parasite persistence in chronic Chagas disease

13

14 #Address correspondence to John M. Kelly, [john.kelly@lshtm.ac.uk](mailto:john.kelly@lshtm.ac.uk)

15

16

17

18

19

20

21

22 Word counts

23 Abstract: 247

24 Text: 4892

25

26 **ABSTRACT** Infections with *Trypanosoma cruzi* are usually life-long despite  
27 generating a strong adaptive immune response. Identifying the sites of parasite  
28 persistence is therefore crucial to understand how *T. cruzi* avoids immune-mediated  
29 destruction. However, this is a major technical challenge because the parasite burden  
30 during chronic infections is extremely low. Here, we describe an integrated approach  
31 involving comprehensive tissue processing, *ex vivo* imaging, and confocal  
32 microscopy, which has allowed us to visualise infected host cells in murine tissue, with  
33 exquisite sensitivity. Using bioluminescence-guided tissue sampling, with a detection  
34 level of <20 parasites, we show that in the colon, smooth muscle myocytes in the  
35 circular muscle layer are the most common infected host cell type. Typically, during  
36 chronic infections, the entire colon of a mouse contains only a few hundred parasites,  
37 often concentrated in a small number of cells containing >200 parasites, that we term  
38 mega-nests. In contrast, during the acute stage, when the total parasite burden is  
39 considerably higher and many cells are infected, nests containing >50 parasites are  
40 rarely found. In C3H/HeN mice, but not BALB/c, we identified skeletal muscle as a  
41 major site of persistence during the chronic stage, with most parasites found in large  
42 mega-nests within the muscle fibres. Finally, we report that parasites are also  
43 frequently found in the skin during chronic murine infections, often in multiple infection  
44 foci. In addition to being a site of parasite persistence, this anatomical reservoir could  
45 play an important role in insect-mediated transmission, and have implications for drug  
46 development.

47

48

49

50 **IMPORTANCE** *Trypanosoma cruzi* causes Chagas disease, the most important  
51 parasitic infection in Latin America. Major pathologies include severe damage to the  
52 heart and digestive tract, although symptoms do not usually appear until decades after  
53 infection. Research has been hampered by the complex nature of the disease and  
54 technical difficulties in locating the extremely low number of parasites. Here, using  
55 highly sensitive imaging technology, we reveal the sites of parasite persistence in  
56 experimental mice at single-cell resolution. We show that parasites are frequently  
57 located in smooth muscle cells in the circular muscle layer of the colon, and that  
58 skeletal muscle cells and the skin can also be important reservoirs. This information  
59 provides a framework for investigating how the parasite is able to survive as a life-long  
60 infection, despite a vigorous immune response. It also informs drug-development  
61 strategies by identifying tissue sites that must be accessed to achieve a curative  
62 outcome.

63

64

65

66

67 **KEY WORDS:** *Trypanosoma cruzi*, Chagas disease, chronic persistence, murine  
68 imaging, colon, skeletal muscle, skin

69

70

71

72

73

74

75 **INTRODUCTION** The intracellular protozoan parasite *Trypanosoma cruzi* is the  
76 etiological agent of Chagas disease, and can infect a wide variety of mammalian hosts.  
77 Transmission to humans is mainly via the hematophagous triatomine insect vector,  
78 which deposits infected faeces on the skin after a blood-meal, with the parasite then  
79 introduced through the bite wound or mucous membranes. Oral, congenital and blood  
80 transfusion are other important transmission routes. 6-7 million people in Latin  
81 America are infected with *T. cruzi* (1), and as a result of migration, there are now  
82 hundreds of thousands of infected individuals in non-endemic regions, particularly the  
83 USA and Europe (2, 3).

84

85 In humans, infection normally results in mild symptoms, which can include fever and  
86 muscle pain, although in children the outcome can be more serious. Within 6 weeks,  
87 this acute phase is usually resolved by a vigorous CD8+ T cell response (4, 5), and in  
88 most cases, the infection progresses to a life-long asymptomatic chronic stage, where  
89 the parasite burden is extremely low and no apparent pathology is observed. However,  
90 in ~30% of individuals, the infection manifests as a symptomatic chronic condition,  
91 although this can take many years to develop. The associated cardiac dysfunction,  
92 including dilated cardiomyopathy and heart failure, is a major cause of morbidity and  
93 mortality (6, 7). In addition, ~10% of those infected display digestive pathologies, such  
94 as megacolon and megaesophagus, which on occasions can occur in parallel with  
95 cardiac disease. There is no vaccine against *T. cruzi* infection, and the current frontline  
96 drugs, benznidazole and nifurtimox, have limited efficacy, require long treatment  
97 regimens, and can result in severe side effects (8, 9). The global effort to discover new  
98 drugs for Chagas disease involves not-for-profit drug development consortia, as well  
99 as the academic and commercial sectors (10, 11). Progress would benefit

100 considerably from a better understanding of parasite biology and disease  
101 pathogenesis.

102

103 One of the major challenges in Chagas disease research is to determine how *T. cruzi*  
104 survives as a life-long infection, despite eliciting a vigorous immune response which  
105 is able to reduce the parasite burden by >99%. Exhaustion of the parasite-specific  
106 CD8+ T cell response does not appear to be the reason (12). Alternative explanations  
107 include the possibility that *T. cruzi* is able to persist in immune-tolerant tissue sites  
108 (13), and the potential for the parasite to assume a non-dividing dormant form that  
109 does not trigger an overt immune response (14). Attempts to investigate these issues  
110 in humans have been limited by the long-term and complex nature of the disease, and  
111 by difficulties in monitoring tissue infection dynamics during the chronic stage. By  
112 necessity, most information on the sites of parasite location in humans has come from  
113 autopsy and transplant studies (15), and the significance of these data to patients in  
114 the asymptomatic chronic stage is unclear. Bioluminescence imaging of animal  
115 models has therefore been adapted as an approach to explore aspects of  
116 host:parasite interaction, disease pathology and drug-development (16-18). Our  
117 previous work has exploited highly sensitive *in vivo* imaging to monitor mice infected  
118 with bioluminescent *T. cruzi* that express a red-shifted luciferase (19-21). These  
119 experiments have shown that mice are useful predictive models for human infections  
120 in terms of infection dynamics (21, 22), drug-sensitivity (23) and the spectrum of  
121 cardiac pathology (24). We have also demonstrated that *T. cruzi* infection is pan-tropic  
122 during the acute stage, and that the adaptive immune response results in a 100 to  
123 1000-fold reduction in the whole animal parasite burden as infections transition to the  
124 chronic phase, a process initiated 2-3 weeks post infection. The gastrointestinal (GI)

125 tract, particularly the colon and/or stomach, was found to be a major site of parasite  
126 persistence during chronic stage infections, but it has not so far been possible to  
127 identify the infected host cell types in these complex tissues. The immune-mediated  
128 restriction to the GI tract was not absolute, with both host and parasite genetics  
129 impacting on the extent to which the infection could disseminate to a range of other  
130 organs and tissues (22). The severity of chronic cardiac pathology in different mouse  
131 strains was associated with the ability of parasites to spread beyond the permissive  
132 niche provided by the GI tract, and with the incidence of cardiac infection. This led us  
133 to propose a model in which the development of chagasic cardiac pathology, was  
134 linked with the frequency of the localised inflammatory immune responses stimulated  
135 by periodic trafficking of parasites into the heart (13).

136

137 More detailed information on the precise sites of parasite survival during chronic  
138 infections will provide new insights into disease pathogenesis, and aid the design of  
139 both immunotherapeutic and chemotherapeutic strategies. The scarcity of parasites  
140 during the chronic stage has made addressing this issue a major challenge, with PCR-  
141 based approaches being both uninformative with respect to host cell types, and  
142 unreliable because of the highly focal and dynamic character of infections (20, 23). To  
143 resolve this, we constructed *T. cruzi* reporter strains engineered to express a fusion  
144 protein that was both bioluminescent and fluorescent (25). This allowed individual  
145 infected host cells to be visualised routinely within chronically infected mouse tissue.  
146 The bioluminescent component facilitates the localisation of infection foci within *ex*  
147 *vivo* tissue samples, and fluorescence then enables histological sections to be rapidly  
148 scanned to identify infected cells (26). The utility of this approach has been further

149 extended by using EdU labelling and TUNEL assays to explore the replicative status  
150 of parasites *in situ*.

151

152 Here, we describe how these enhanced imaging procedures, coupled with  
153 modifications to tissue processing, have allowed us to identify the sites of parasite  
154 persistence during chronic murine infections. We reveal that the circular muscle layer  
155 is the major reservoir of infection in the colon, that skeletal muscle can be an important  
156 site of persistence, although this phenomenon appears to be strain-specific, and that  
157 the skin can harbour multiple infection foci.

158

159

160

161

162

163

164

165

166

167

168

169

170

171

172

173

174 **RESULTS**

175 **Locating the sites of *T. cruzi* persistence within the external wall of the colon**

176 **during chronic murine infections.** In multiple murine models, with a variety of

177 parasite strains, bioluminescence imaging has revealed that the GI tract, particularly

178 the large intestine and stomach, is a major site of parasite persistence during chronic

179 *T. cruzi* infection (20, 22). However, our understanding of how this impacts on

180 pathogenesis has been complicated by the difficulty in precisely locating, and then

181 visualising, parasite infected cells. To resolve these technical issues, we infected mice

182 with the *T. cruzi* CL-Luc::Neon line that constitutively expresses a reporter fusion

183 protein that is both bioluminescent and fluorescent (25), and adapted our dissection

184 procedures to allow a more detailed assessment of parasite location (Materials and

185 Methods). At various periods post-infection, the colon of each mouse was removed,

186 pinned luminal side up, and peeled into two distinct sections (Fig. 1a and b) - the

187 mucosal layers consisting of (i) thick mucosal, muscularis mucosa, and submucosal

188 tissue, and (ii) the muscular coat, including the longitudinal and circular smooth muscle

189 layers, the enteric neuronal network, at the level of the myenteric plexus, intramuscular

190 neurons and extrinsic nerve fibres. The resulting external gut wall mount is thin

191 enough, and sufficiently robust, to allow the full length of the colon to be viewed in its

192 entirety at a 3-dimensional level by confocal laser scanning microscopy. Using this

193 approach, each bioluminescent focus in live peeled tissue from chronically infected

194 mice could be correlated with fluorescent parasites in individual infected host cells

195 (Fig. 1c and d). The resulting images revealed that the limit of detection achievable by

196 bioluminescence imaging is less than 20 parasites. This level of sensitivity, in an ex

197 vivo context, confirms the utility of this model for studies on infection dynamics (22),

198 and drug and vaccine efficacy (24, 27, 28). In infected host cells, the number of



199 parasites could be determined with precision using full-thickness serial Z-stacking (Fig.  
200 1e, Fig. S1). This allowed us to establish that the total number of parasites persisting  
201 in the external colonic wall (tunica muscularis) of a chronically infected mouse is  
202 typically in the range of a few hundred ( $697 \pm 217$ ,  $n=16$ ), although this number can  
203 be higher if the tissue contains one or more “mega-nests” (Fig. 1c, highlighted in  
204 yellow, as example).

205

206 When we compared parasite distribution in the external gut wall during acute and  
207 chronic murine infections, the most striking difference was the presence in the chronic  
208 stage of some host cells that were infected with  $>200$  parasites (Fig. 2). The existence  
209 of these mega-nests resulted in a significant alteration in parasite number distribution  
210 at the level of single infected host cells (Fig. 1, Fig. 2b-d). In acute infections, parasites  
211 were spread between many more host cells, with the average parasite content per cell  
212 remaining relatively low (Mouse (M)1=6.5, M2=6.7, M3=6.5, M4=4.6, M5=19.7,  
213 mean=9.4,  $1.15 < \mu < 16.46$ , 95% confidence interval) (Fig. 2a, c and d). In the chronic  
214 stage, the situation was different. Of the total parasite number in the smooth muscle,  
215 more than half were present in mega-nests of  $>200$ , although most infected cells  
216 ( $>90\%$ ) contained fewer than 50 parasites. Nest size could extend to  $>1000$  parasites.  
217 The number per infected cell was determined by Z-stacking, which could be done with  
218 accuracy, even at this level of parasite burden (for details, see Fig. S1). In the chronic  
219 stage, fully developed trypomastigotes were not observed in any of the infected cells  
220 examined during this study. In contrast, fully developed flagellated trypomastigotes  
221 were routinely observed in nests during the acute stage (Fig. 2e, as example). We did  
222 not find a single mega-nest in external colonic wall tissue derived from any animal  
223 during an acute stage infection, with 63 parasites being the maximum.

224

225 To more accurately determine the specific location of parasites within the colon of  
226 chronically infected mice, we made histological sections of paraffin embedded whole  
227 colon tissue derived from both C3H/HeN and BALB/c mice infected with the CL Brener  
228 dual reporter strain. Using bioluminescence-guided sampling and confocal imaging,  
229 we exhaustively searched the tissue sections for fluorescent parasites (>100 sections  
230 per mouse). Bioluminescent foci could be well correlated with individual infected host  
231 cells, or small numbers of infected cells in close proximity (Fig. 3b, Fig. S2). Infected  
232 cells were most commonly located in the circular muscle layer, and only infrequently  
233 in the longitudinal muscle, or, despite its relatively larger size/volume, the mucosal  
234 layer (Fig. 2, Fig. 3b and c, Fig. S2). No infections of the columnar epithelial cells in  
235 the mucosal layer were detected in any mouse. We therefore conclude that in the  
236 colon, smooth muscle tissue is the major, although not the exclusive site of parasite  
237 persistence during chronic infection. Consistent with the whole mount imaging results  
238 (Fig. 2c), there was high variability in the number of *T. cruzi* per infected cell in the  
239 colonic tissue, ranging from single parasites to nests of >200, but no obvious  
240 correlation between the parasite burden per cell and the location of the infected cells  
241 within the various tissue layers. In the whole tissue mounts, based on the  
242 bioluminescence profile, there was a tendency for the proximal region of the colon to  
243 be more highly infected than the mid and distal regions, although this did not reach  
244 statistical significance (Wilcoxon rank sum test) (Fig. 4a).

245

246 To identify the major cell type(s) which act as parasite hosts during chronic infections  
247 of the GI tract, we single-stained whole mounted external colonic wall sections with  
248 specific antibodies against SMA- $\alpha$  (smooth muscle actin- $\alpha$ ),  $\beta$ -tubulin-3 (a marker for

249 neurons), and CD45 (a broad range marker of all nucleated hematopoietic cells)  
250 (Materials and Methods). These experiments showed that smooth muscle myocytes  
251 were the predominant host cell type (Fig. 4b and c), with a minority of infected cells  
252 stained with the neuronal or leukocyte marker. Interestingly, mega-nests, cells infected  
253 with >200 parasites, were refractive to staining with any of the three markers (Fig. 4b).

254

255 **Assessing skeletal muscle and the skin as sites of parasite persistence during**  
256 **chronic stage murine infections.** For this study, BALB/c and C3H/HeN mice were  
257 chronically infected with *T. cruzi* CL-Luc::Neon (25), and the dissection procedures  
258 used for *ex vivo* imaging (Fig. 5a) were further modified to extend the range of tissue  
259 sites that could be assessed (Materials and Methods). Total removal of the skin and  
260 fur from the carcass allowed the whole of the skeletal muscle system to be exposed  
261 and imaged (Fig. 5b and d). The skin could also be placed fur side down and imaged  
262 in its entirety after the removal of adipose tissue. All adipose tissue harvested during  
263 the dissection process was combined to be imaged separately.

264

265 Each C3H/HeN mouse registered a bioluminescence signal in the skeletal muscle  
266 during chronic stage infections (n=16) (Fig. 5c). It could be inferred from the  
267 bioluminescence intensity that the parasite burden in this strain was significantly  
268 higher in skeletal muscle than in other organs or tissues, including the GI tract and  
269 lungs (*p*-value <0.001, Wilcoxon signed rank test) (Fig. 5b and c). As previously  
270 reported (22), parasite burden and dissemination during chronic stage infections is  
271 more extensive in C3H/HeN mice than in other mouse models. In line with this, we did  
272 not routinely detect highly bioluminescent foci in the skeletal muscle of BALB/c mice  
273 (Figure 5b and c). In addition, the adipose samples of the BALB/c mice were

274 consistently close to background levels, whereas with the C3H/HeN mice, more than  
275 half displayed a detectable signal ( $>2$ SDs above background radiance) (Fig. 5c).  
276 Following bioluminescence-guided excision (Fig. 5d), infected foci from C3H/HeN  
277 skeletal muscle were subjected to histological sectioning and examined by confocal  
278 microscopy, with parasites detected on the basis of green fluorescence. Consistent  
279 with the external colonic wall data (Fig. 1), strong bioluminescent foci corresponded  
280 with large mega-nests constituted by many hundreds of parasites (Fig. 5d). Co-  
281 staining of these skeletal muscle sections with anti-actin- $\alpha$  antibodies revealed that  
282 the mega-nests were internal to the muscle fibres. Therefore, skeletal muscle  
283 represents an important site of parasite persistence in chronically infected C3H/HeN  
284 mice, but not in BALB/c.

285

286 Previous studies have shown evidence of *T. cruzi* infection foci localised to skin  
287 samples (20, 22). However, the extent to which the skin could act as a potential  
288 reservoir site has not been evaluated systematically. To investigate this, we infected  
289 C3H/HeN and BALB/c mice with the bioluminescent *T. cruzi* lines JR (DTU I) or CLBR  
290 (DTU VI), and employed a modified dissection protocol that allowed near-complete  
291 skins from infected mice to be subjected to *ex vivo* imaging after removal of  
292 subcutaneous adipose tissue (Materials and Methods) (Fig. 6a). Depending on the  
293 infection model, between 80% and 90% of mice had at least one discernible focus of  
294 skin infection (Fig. 6b). For all four parasite:mouse strain combinations, we observed  
295 a wide range of skin parasitism patterns, as judged by both the number and the  
296 intensity of the bioluminescent foci (Fig. 6a and b). There was some evidence that  
297 C3H/HeN mice had more CL Brener skin parasites than BALB/c mice (Fig. 6b and c).  
298 Infections with the CL Brener strain produced more discrete foci and a higher inferred

299 parasite load than JR infections, although some of this effect could be attributed to  
300 lower luciferase expression levels in the JR strain (22). Skin imaging was conducted  
301 after removal of subcutaneous adipose tissue by dissection, strongly suggesting that  
302 the majority of parasites were resident in the dermis. To visualise parasites at the  
303 cellular level, bioluminescence positive biopsies were processed for thin section  
304 fluorescence imaging from infections with parasites expressing the  
305 bioluminescent:fluorescent fusion protein (n~300 sections from 5 mice). Visualisation  
306 of infected cells in the skin biopsies was more technically challenging than for other  
307 tissues. Only a single, apparently multinucleated infected cell was identified (Fig. 6d),  
308 containing approximately 30 parasites and located within 150  $\mu\text{m}$  of the epidermis.  
309 Parasites in this anatomical location are likely to have a role in disease transmission.

310

311

312

313

314

315

316

317

318

319

320

321

322

323

## 324 **DISCUSSION**

325 Chronic Chagas disease in humans is characterised by long-term parasite persistence  
326 at levels that are difficult to monitor with accuracy, even using highly sensitive PCR-  
327 based techniques. This has been a complicating factor in diagnosis, and in monitoring  
328 therapeutic cure during clinical trials (29, 30). Additionally, it has not been possible to  
329 identify the main tissues and/or organs that function as sites of parasite persistence in  
330 an immunological environment that otherwise tightly controls the infection. Information  
331 on the systemic parasite load and location throughout the infection would provide a  
332 better understanding of disease progression and the determinants of the wide  
333 spectrum of symptoms that are characteristic of this chronic condition. Experimental  
334 animal models have proved to be invaluable experimental tools for providing data in  
335 these areas, particularly in combination with genetically modified parasite reporter  
336 strains. These systems can provide real-time readouts on infection dynamics (20, 22,  
337 31), insights into tissue tropism (26), and information on the influence of host and  
338 parasite genetics. The murine models used in the current study display a similar  
339 infection profile to that in humans, have proved to be predictive of drug efficacy, and  
340 display a spectrum of cardiac pathology that mirrors aspects of the human disease.

341

342 Here, we exploited parasites that express fusion proteins containing bioluminescent  
343 and fluorescent domains. Together with improved tissue preparation techniques, this  
344 has enabled us to achieve a limit of detection by *ex vivo* imaging that is less than 20  
345 parasites (Fig. 2d and e). By facilitating the routine detection of parasites in their tissue  
346 context, at the level of individual host cells, these approaches have overcome a major  
347 barrier that has restricted progress in the investigation of chronic *T. cruzi* infections.  
348 Previous reports using bioluminescent parasites identified the GI tract as a major site

349 of parasite persistence during the chronic stage (20, 22). However, these studies,  
350 which involved several mouse:parasite strain combinations, revealed few details on  
351 the nature of host cells, or on their precise location within tissue. In the colon, we have  
352 now shown that the circular smooth muscle coat is the predominant site of parasite  
353 persistence (Fig. 3) and that smooth muscle myocytes are the main infected host cell  
354 type. Enteric neurons can also be parasitized, but these infections are much less  
355 common (Fig. 4). The extent to which this apparent tropism is determined by a  
356 metabolic preference for the corresponding regions/cells, or by the immunological  
357 microenvironment is not known. Interestingly, external colonic wall resident CD45+ve  
358 hematopoietic cells were rarely infected (Fig. 4a), even though myeloid cells are well  
359 known targets during the acute stage infection in other sites such as the spleen or  
360 bone marrow. We also failed to find a single instance where parasites infected  
361 epithelial cells on the mucosal surface, suggesting that parasitized cells or  
362 trypomastigotes are unlikely to be shed into the lumen of the large intestine.

363

364 Experiments have shown that parasite survival in the colon during chronic infections  
365 reflects crucial differences between the immune environment of certain GI tract  
366 regions and systemic sites (22). Immunosuppression of infected mice leads to  
367 widespread parasite dissemination to other less permissive organs and tissues,  
368 including the heart. There is clearly a host genetic component to this immune  
369 restriction since the same parasite strains display a wider tissue distribution in  
370 C3H/HeN mice than in the BALB/c strain (Fig. 5c), a phenomenon which is associated  
371 with increased cardiac pathology (22). In the human population, this highlights that  
372 genetic diversity affecting the functioning of the immune system and its ability to  
373 restrict the tissue range of *T. cruzi* to reservoir sites could be a major determinant of

374 Chagas disease pathology. Within C3H/HeN mice, skeletal muscle was also found to  
375 be an important site of persistence during the chronic stage, whereas in the BALB/c  
376 strain, parasites were far less evident in this location (Fig. 5c). Some *T. cruzi* strains  
377 have been reported to be myotropic in mice, with pathological outcomes that include  
378 paralyzing myositis and skeletal muscle vasculitis (32). Myocyte infections could also  
379 provide the parasite with access to myoglobin, a source of haem or iron that may  
380 contribute to a nutritional environment that is favourable for replication. The ability of  
381 high numbers of parasites to survive long-term in the skeletal muscle, compared to  
382 other sites, indicates that this tissue can function as a more immunologically  
383 permissive niche in the genetic background of the C3H/HeN mouse. Strikingly,  
384 myocytes in this tissue could contain several hundred parasites (Fig. 5d). We have  
385 previously suggested that the existence of large mega-nests such as these could have  
386 implications for drug efficacy (26), with parasites in the centre of the nest having  
387 reduced drug exposure compared to those on the periphery, possibly contributing to  
388 treatment failure. This form of “herd-protection” may not be captured in the type of  
389 high-throughput *in vitro* screening assays that are a common feature of the drug  
390 development process. It will also be interesting to explore whether some parasites  
391 within these mega-nests adopt a metabolically quiescent state, analogous to the  
392 dormant phenotype recently reported (14).

393

394 Our study has also demonstrated that the skin is another location where *T. cruzi* can  
395 be frequently detected during chronic infections. In both C3H/HeN and BALB/c mice,  
396 infection levels of >80% were observed, although there was considerable variability in  
397 the level of infectivity in terms of the number of bioluminescent foci and the total  
398 parasite load. The extent of this only became apparent when the entire skin of the



399 mouse was examined by *ex vivo* imaging with the fur side down (Fig. 6), presumably  
400 because bioluminescent signals at the levels displayed by the majority of foci are  
401 masked by the fur when monitored by *in vivo* imaging. Skin-localised parasites are a  
402 common and well characterised feature of many *Leishmania* species infections. More  
403 recently, it has also been reported that *Trypanosoma brucei*, can also be detected in  
404 the skin of both mice and humans, and that these parasites could have important roles  
405 in persistence and transmission (33, 34). Until now, descriptions of cutaneous *T. cruzi*  
406 have been restricted to intermittent (chagoma and Romaña's sign) or atypical  
407 manifestations of the acute stage (35), or to reactivation of chronic infections as a  
408 result of immunosuppression (36, 37). Parasites in the dermal layers (Fig. 6) have the  
409 potential to play a crucial role in transmission of Chagas disease since they would  
410 have ready access to the triatomine vector during a blood meal. It will also be important  
411 to determine whether these skin-resident parasites are persistent at this location, or  
412 whether they represent a transient population that is constantly re-seeded from other  
413 permissive niches, such as the GI tract (13). Resolution of this question will help to  
414 inform drug-design by revealing whether the ability to access parasites in the dermal  
415 layers has to be a pre-requisite property of novel therapeutics. In murine models of *T.*  
416 *brucei* infection, adipose tissue also forms an important parasite reservoir (38). This  
417 was not the case with chronic *T. cruzi* infections of BALB/c mice (Fig. 5c), where  
418 parasites were largely absent from these tissue sites. Bioluminescent foci were  
419 detected in the adipose tissues in approximately half of the chronically infected  
420 C3H/HeN mice. However, rather than a specific tropism, this may simply reflect the  
421 immunological context in C3H/HeN mice, which allows more extensive parasite  
422 distribution than in other mouse models (22).

423

424 In summary, we have provided new data on the sites of parasite persistence in murine  
425 models of chronic Chagas disease. This provides a framework for identifying the  
426 immunological parameters that determine whether a specific tissue site can act as a  
427 permissive niche, and for investigating the extent to which the parasite itself has a  
428 direct role in the process.

429

430

431

432

433

434

435

436

437

438

439

440

441

442

443

444

445

446

447

448

## 449 MATERIALS AND METHODS

450 **Ethics.** Animal work was carried out under UK Home Office project licenses (PPL  
451 70/8207 and P9AEE04E4) and approved by the LSHTM Animal Welfare and Ethical  
452 Review Board. All procedures were conducted in accordance with the UK Animals  
453 (Scientific Procedures) Act 1986 (ASPA).

454

455 **Parasites, mice and infections.** Two parasite reporter strains were used; the  
456 bioluminescent:fluorescent *T. cruzi* CL-Luc::Neon, a CL Brener clone (DTU VI)  
457 engineered to express a fusion protein containing red-shifted luciferase linked to the  
458 mNeonGreen chromophore (20, 25), and a JR clone (DTU I), which expresses red-  
459 shifted luciferase (19, 22). Parasites were grown as epimastigotes at 28°C in RPMI-  
460 1640 supplemented with 0.5% (w/v) tryptone, 20 mM HEPES pH 7.2, 30 mM haemin,  
461 10% heat-inactivated fetal bovine serum, 2 mM sodium glutamate, 2 mM sodium  
462 pyruvate, 100 µg ml<sup>-1</sup> streptomycin and 100 U ml<sup>-1</sup> penicillin, with 150 µg ml<sup>-1</sup>  
463 hygromycin (CL Brener) or 100 µg ml<sup>-1</sup> G418 (JR) as selective drugs. Metacyclic  
464 trypomastigotes (MTs) were obtained by transfer to Graces-IH transformation medium  
465 (39). MTs were harvested after 4–7 days, when typically, 70–90% of parasites had  
466 differentiated. Tissue culture trypomastigotes were obtained from the infected MA104  
467 kidney epithelial cell line grown at 37°C in 5% CO<sub>2</sub> using Minimal Eagles medium  
468 supplemented with 10% heat-inactivated fetal bovine serum.

469

470 BALB/c and C3H/HeN mice were purchased from Charles River (UK), and CB17 SCID  
471 mice were bred in-house. Animals were maintained under specific pathogen-free  
472 conditions in individually ventilated cages. They experienced a 12 h light/dark cycle  
473 and had access to food and water *ad libitum*. Female mice aged 8-12 weeks were

474 used for all infections. SCID mice were infected with  $1 \times 10^4$  *in vitro*-derived tissue  
475 culture trypomastigotes in 0.2 ml PBS via i.p. injection. All other mice were infected by  
476 i.p injection with  $1 \times 10^3$  bloodstream trypomastigotes derived from parasitemic SCID  
477 mouse blood. All infected SCID mice developed fulminant infections and were  
478 euthanized at, or before, humane end-points. At experimental end-points, mice were  
479 sacrificed by lethal injection with 0.1-0.2 ml Dolethal.

480

481 ***Ex vivo* bioluminescence imaging.** For *ex vivo* imaging, mice were injected with  
482  $150 \text{ mg kg}^{-1}$  d-luciferin i.p., then sacrificed by lethal i.p. injection 5 min later (20, 21).  
483 Mice were perfused with 10 ml  $0.3 \text{ mg ml}^{-1}$  d-luciferin in PBS via the heart. Organs and  
484 tissues were imaged in three stages using the IVIS Spectrum system (Caliper Life  
485 Science) and the LivingImage 4.7.2 software. Firstly, heart, lungs, spleen, liver, GI  
486 tract, GI mesenteric tissue, kidneys and all visceral adipose tissue were transferred to  
487 a Petri dish in a standardized arrangement, soaked in  $0.3 \text{ mg ml}^{-1}$  d-luciferin in PBS  
488 and then imaged using maximum detection settings (2 min exposure, large binning).  
489 Then, the skin was removed from the carcass and subcutaneous adipose tissue  
490 removed (40) and added to the visceral fat creating a whole 'adipose tissue' sample,  
491 which was imaged in the same way. The skin was placed fur down, soaked in  $0.3 \text{ mg}$   
492  $\text{ml}^{-1}$  d-luciferin and imaged under the same conditions as the internal organs. The  
493 skeletal muscle was placed dorsal side up and soaked in  $0.3 \text{ mg ml}^{-1}$  d-luciferin and  
494 imaged, as above.

495

496 To quantify infection intensities in *ex vivo* tissues, individual regions of interest (ROIs)  
497 were drawn to quantify bioluminescence expressed as radiance (photons/s/cm<sup>2</sup>/sr).  
498 Because different tissue types from uninfected control mice have different background

499 radiances, we normalized the data from infected mice using matching tissues from  
500 uninfected controls (n=4) and used the fold-change in radiance, compared with these  
501 tissue-specific controls, as the final measure of *ex vivo* bioluminescence. Detection  
502 thresholds for *ex vivo* imaging were determined using the fold-change in radiance for  
503 ROIs in images obtained from infected mice compared with matching empty ROIs in  
504 images from uninfected control mice of comparable age.

505

506 In some experiments, the colon was removed after standard imaging, an incision was  
507 made down the line of mesentery attachment, and the tissue sample pinned out under  
508 a dissection microscope. Using ultrafine tweezers, large sections of the smooth  
509 muscular coat from the other layers were peeled off, whilst the tissue remained bathed  
510 in 0.3 mg ml<sup>-1</sup> d-luciferin (40). After imaging, luciferin was removed by 2x washing with  
511 PBS. Tissue was fixed with 4% paraformaldehyde for 45 min, followed by 2x washes  
512 with PBS (40). External colonic wall tissue was then whole mounted in Vectashield  
513 and imaged as below.

514

515 Histological sections were created after bioluminescence-guided excision of infection  
516 foci from skeletal muscle and colon tissue (25, 26, 40). The biopsies were first  
517 incubated in 95% EtOH at 4°C overnight, and then washed in 100% EtOH (4x10 min),  
518 followed by xylene (2x12 min). The samples were embedded by placing in melted  
519 paraffin wax (2x12 min). The wax was allowed to set and the embedded pieces were  
520 sectioned into 5-20 µm histological sections using a microtome. The sections were  
521 melted and paraffin dissolved in xylene for 30 s, then washed in 95% EtOH (3x1 min),  
522 followed by 3 washes in PBS. Sections were then mounted in Vectashield and imaged  
523 using the Zeiss LSM880 confocal microscope. For precise counting of intracellular

524 parasites, samples were imaged in 3-dimensions, with the appropriate scan zoom  
525 setting, and the files exported for analysis using image J software (see Fig. S1).

526

527 **Antibody staining.** Deparaffinized sections were incubated at 4°C overnight in  
528 primary antibody diluted at 1:200 in PBS/0.5% fetal bovine serum. Antibodies against  
529  $\beta$ -tubulin-3 (Biolegend, Cat#802001), CD45 (Tonbo Biosciences, Cat#70-0451),  
530 smooth muscle actin (Sigma, Cat#A2547), and skeletal muscle actin (Thermo Fisher,  
531 Cat#MA5-12542) were used to stain for neuronal, nucleated hematopoietic, smooth  
532 muscle and skeletal muscle cells, respectively. Secondary antibodies (all obtained  
533 from Thermo Fisher) diluted 1:500 in PBS were incubated on sections for 3 h at room  
534 temperature before mounting. Both primary and secondary antibodies were removed  
535 by 3x2 min washes in PBS. For staining of whole colon external wall sections, the  
536 tissue was submerged in the primary antibody dilution for 48 h at 4°C, and then  
537 submerged in the secondary dilution at room temperature for 3 h before 3x2min  
538 washes in PBS.

539

#### 540 **Statistics**

541 The Shapiro-Wilk test for normality, and the Wilcoxon rank sum non-parametric test  
542 were used to analyse the data presented in Fig. 4 and 5. Two-way ANOVA with  
543 Tukey's post hoc correction testing was used for Fig. 6. All tests were performed in  
544 GraphPad Prism v.8.

545

546

547

548

549 **ACKNOWLEDGEMENTS**

550 This work was supported by the following awards: UK Medical Research Council  
551 (MRC) Grants MR/T015969/1 to JMK and MR/R021430/1 to MDL, and MRC LID  
552 (DTP) Studentship MR/N013638/1 to AIW. The funders had no role in study design,  
553 data collection and interpretation, or the decision to submit the work for publication.

554

555

556

557

558

559

560

561

562

563

564

565

566

567

568

569

570

571

572

573

574 **FIG 1** The limit of detection by *ex vivo* bioluminescence imaging of the murine colon  
575 is less than 20 parasites. (a) *Ex vivo* bioluminescence imaging of a section of the colon  
576 from a C3H/HeN mouse chronically infected (155 days post-infection) with *T. cruzi* CL-  
577 Luc::Neon (25), pinned luminal side up. The bioluminescence signal is on a linear  
578 scale pseudocolour heat map (same for all bioluminescence images in this figure). (b)  
579 Schematic showing the distinct layers of the GI tract (see also Fig. 3a). The dashed  
580 red line indicates the position above which tissue can be peeled off to leave the  
581 external colonic wall layers. (c) Bioluminescence image of a colonic wall section after  
582 peeling. The insets show the fluorescent parasites (green) detected after exhaustive  
583 3-dimensional imaging of the tissue section (Materials and Methods), and the numbers  
584 detected. Parasites corresponding to one bioluminescent focus (marked by '?') could  
585 not subsequently be found, due to technical issues. (d) Upper image; an external  
586 colonic wall layer from a separate mouse showing the correlation of bioluminescence  
587 imaging and fluorescence (green), including an infection focus with 16 parasites (left)  
588 (white scale bars=20  $\mu$ m). Lower image; staining with DAPI identifies the location of  
589 parasite (small) and host cell (large) DNA. (e) Determination of parasite number. Serial  
590 Z-sections of the external colonic wall tissue containing the parasite nest shown in (d)  
591 indicate how 3-dimensional imaging can be used to calculate the number of parasites  
592 on the basis of DNA staining. See Fig. S1 for more detail.

593

594 **FIG 2** In the external colonic wall of chronic stage mice, cells infected with more than  
595 200 parasites contain much of the *T. cruzi* population. (a) Bioluminescence imaging of  
596 peeled colon isolated from a C3H/HeN mouse 15 days post-infection (acute stage).  
597 After mounting, the region of interest (ROI) encompassed by the red line was  
598 exhaustively searched by confocal microscopy. 35 infected cells were found within the



599 ROI, 3 of which are shown. Parasites, green. (b) Using the same approach, the  
600 external colonic wall from a chronically infected mouse (183 days post-infection) was  
601 assessed. The bioluminescent focus corresponded to a single highly infected host cell.  
602 White scale bars=20  $\mu$ m. (c) Pooled data from *T. cruzi* infected cells in peeled colonic  
603 wall tissue muscle, isolated from 5 acutely and 16 chronically infected mice. Tissue  
604 was examined and the number of parasites per host cell established after the use of  
605 Z-stacking to provide a 3-dimensional image (Fig. S1). Each dot represents a single  
606 infected cell (acute stage, n=1198; chronic stage, n=140). (d) The same data set  
607 expressed as the % of the total parasites detected in the colons of mice in the acute  
608 (n=5) and chronic (n=16) stage of infection, by nest size category. (e) An infected cell  
609 in the colon of a mouse in the acute stage (15 days post-infection) of infection in which  
610 the parasites have differentiated to flagellated trypomastigotes.

611

612 **FIG 3** The majority of parasites in the colon of a chronically infected mouse are located  
613 in the circular muscle section. (a) Depiction of the layers of the GI tract, correlated with  
614 the phase (left) and DNA stained (DAPI) (right) images of the same tissue section. (b)  
615 Examples of host cells infected with fluorescent parasites (green) detected in different  
616 layers of the GI tract (see also Fig. S2). Infection foci were located by confocal imaging  
617 of fixed histological sections. (c) Summary of parasite location data obtained from  
618 chronically infected C3H/HeN and BALB/c mice.

619

620 **FIG 4** Smooth muscle cells are the predominant infected cell type in the GI tract of  
621 chronically infected mice. (a) Bioluminescence image of the large intestine of a  
622 chronically infected C3H/HeN mouse indicating the proximal, mid and distal regions,  
623 defined as the first, second and third segments measured using image J software.

624 Data were analysed as described (Materials and Methods) (n=14) and are presented  
625 in the bar chart as the average radiance (p/s/cm<sup>2</sup>/sr) minus the background. (b)  
626 Illustrative images taken with the mounted external colonic wall section, following  
627 staining with cell type specific antibodies (Materials and Methods). Upper, infected  
628 smooth muscle cell. Middle, infected neuronal cell. Lower, a large parasite nest,  
629 refractive to staining with any of the 3 markers. (c) Bar chart summarising distribution  
630 of infection by host cell type. External colonic wall sections were single-stained with  
631 cell type specific antibodies. For smooth muscle (SMA- $\alpha$ ; n=4 mice, 24 infected cells,  
632 20+ve); for neuronal cells ( $\beta$ -tubulin-3; n=3 mice, 14 infected cells, 2+ve); for immune  
633 cells (CD45, n=8 mice, 61 infected cells, 1+ve).

634

635 **FIG 5** Skeletal muscle is a major site of parasite persistence during chronic *T. cruzi*  
636 infections in C3H/HeN mice, but not BALB/c. (a) *Ex vivo* imaging of organs and tissues  
637 from a BALB/c mouse chronically infected with bioluminescent *T. cruzi* CL Brener. (b)  
638 Dorsal bioluminescence imaging of chronically infected BALB/c and C3H/HeN mice  
639 following removal of internal organs, fur, skin and major adipose depots (Material and  
640 Methods). (c) Fold change in radiance (photons/s/cm<sup>2</sup>/sr) established by *ex vivo*  
641 bioluminescence imaging of internal tissues and organs and skeletal muscle as  
642 imaged in (a) and (b). Dashed line indicates the detection threshold equal to the mean  
643 +2SDs of the bioluminescence background derived from corresponding empty regions  
644 of interest obtained in tissue from age-matched uninfected mice. For technical  
645 reasons, on a small number of occasions, data could not be acquired for tissue  
646 samples from some mice (eg adipose tissue). (d) Bioluminescent foci from skeletal  
647 muscle were excised, histological sections prepared, and then scanned by confocal  
648 microscopy (Materials and Methods). Sections were stained with specific markers for

649 muscle (actin- $\alpha$ , red) and DNA (DAPI; blue/turquoise). Parasites can be identified by  
650 green fluorescence. White scale bars=20  $\mu$ m.

651

652 **FIG 6** The skin is a major site of parasite persistence during chronic *T. cruzi* infections  
653 in mice. (a) *Ex vivo* bioluminescence imaging of skin (adipose tissue removed) from  
654 chronically infected BALB/c and C3H/HeN mice (>150 days post-infection) showing  
655 representative examples of low, medium and high parasite load. The bioluminescence  
656 signal is on a log<sub>10</sub> scale pseudocolour heat map. (b and c) Quantification of the  
657 number of discrete infection foci (b) and the bioluminescence intensity for each skin  
658 (c). Data points are individual animals, with empty circles indicating skins having zero  
659 radiance above background. Mean values  $\pm$ SEM are shown. Percentages in grey  
660 boxes (b) refer to the number of animals with at least one focus above the  
661 bioluminescence threshold. Infections with both *T. cruzi* CL Brener and JR  
662 bioluminescent strains were assessed (n=12-26 animals per combination, 3-4  
663 independent experiments). Groups were compared by 2-way ANOVA. (d) Confocal  
664 micrographs showing fluorescent CL Brener parasites in an infected cell within the  
665 dermis of a BALB/c mouse 230 days post-infection (surface to the right). Upper image  
666 (200x). Asterisk indicates a gap resulting from a cutting artefact. Lower two images  
667 (630x) highlight the region in the white boxed area (above). White scale bars=100  $\mu$ m.

668

669

670

671

672

673

674 **SUPPLEMENTAL MATERIAL**

675

676 **FIG S1** The determination of parasite numbers in highly infected host cells. (a)  
677 Bioluminescent image of a peeled large intestine from a C3H/HeN mouse chronically  
678 infected with *T. cruzi* CL-Luc::Neon. (b) The excised tissue was imaged by confocal  
679 microscopy (x100) to reveal a highly infected smooth muscle cell (parasites, green).  
680 (c) The same image showing DAPI staining (blue) to reveal DNA. (d) For Z-stack  
681 analysis, the image was split into grids using the ZEN software. Parasite load was  
682 determined from the number of discoid-shaped kinetoplasts. To facilitate accurate  
683 counting, the relatively faint staining of the nuclear genome can be reduced by  
684 adjusting the contrast. (e) A series of 4 representative Z-stacked images from a total  
685 of 13 slices taken to assess parasite number across the infected cell. A total of 60  
686 parasites were assigned to this 3-dimensional grid. The total number of parasites in  
687 the nest was 1969.

688

689 **FIG S2** Location of parasites within the murine GI tract during chronic *T. cruzi*  
690 infection. C3H/HeN mice were chronically infected with *T. cruzi* CL-Luc::Neon and the  
691 colon was examined by confocal imaging of histological sections following DNA  
692 staining (DAPI) (Materials and Methods). Host cells infected with fluorescent parasites  
693 (green, indicated by white arrows) were detected in different layers of the GI tract, as  
694 indicated. White scale bars=20  $\mu$ m.

695

696

697

698

699 **REFERENCES**

- 700 1. WHO. 2020. Chagas disease. [www.who.int/news-room/fact-sheets/detail/chagas-](http://www.who.int/news-room/fact-sheets/detail/chagas-disease-(american-trypanosomiasis))  
701 [disease-\(american-trypanosomiasis\)](http://www.who.int/news-room/fact-sheets/detail/chagas-disease-(american-trypanosomiasis)).
- 702 2. Requena-Mendez A, Aldasoro E, de Lazzari E, Sicuri E, Brown M, Moore DA,  
703 Gascon J, Muñoz J. 2015. Prevalence of Chagas disease in Latin-American migrants  
704 living in Europe: a systematic review and meta-analysis. *PLoS Negl Trop Dis*  
705 9:e0003540.
- 706 3. Bern C, Messenger LA, Whitman JD, Maguire JH. 2019. Chagas disease in the  
707 United States: a public health approach. *Clin Microbiol Rev* 33:e00023-19.
- 708 4. Cardillo F, de Pinho RT, Antas PR, Mengel J. 2015. Immunity and immune  
709 modulation in *Trypanosoma cruzi* infection. *Pathog Dis* 73:ftv082.
- 710 5. Tarleton RL. 2015. CD8+ T cells in *Trypanosoma cruzi* infection. *Semin*  
711 *Immunopath* 37:233-238.
- 712 6. Ribeiro AL, Nunes MP, Teixeira MM, Rocha MO. 2012. Diagnosis and management  
713 of Chagas disease and cardiomyopathy. *Nature Rev Cardiol* 9:576-589.
- 714 7. Cunha-Neto E, Chevillard C. 2014. Chagas disease cardiomyopathy:  
715 immunopathology and genetics. *Mediat Inflamm* 2014:683230.
- 716 8. Wilkinson SR, Kelly JM. 2009. Trypanocidal drugs: mechanisms, resistance and  
717 new targets. *Exp Rev Molec Med* 11:e31, 1-24.
- 718 9. Gaspar L, Moraes CB, Freitas-Junior LH, Ferrari S, Costantino L, Costi MP, Coron  
719 RP, Smith TK, Siqueira-Neto JL, McKerrow JH, Cordeiro-da-Silva A. 2015. Current  
720 and future chemotherapy for Chagas disease. *Curr Med Chem* 22:4293-4312.
- 721 10. Katsuno, K., Burrows, J. N., Duncan, K., Hooft van Huijsduijnen, R., Kaneko, T.,  
722 Kita K, Mowbray CE, Schmatz D, Warner P, Slingsby BT. 2015. Hit and lead criteria

- 723 in drug discovery for infectious diseases of the developing world. *Nature Rev Drug Dis*  
724 14:751-758.
- 725 11. Chatelain E. 2016. Chagas disease research and development: Is there light at  
726 the end of the tunnel? *Comput Struct Biotech J* 15:98-103.
- 727 12. Pack AD, Collins MH, Rosenberg CS, Tarleton RL. 2018. Highly competent, non-  
728 exhausted CD8+ T cells continue to tightly control pathogen load throughout chronic  
729 *Trypanosoma cruzi* infection. *PLoS Pathog* 14:e1007410.
- 730 13. Lewis MD, Kelly JM. 2016. Putting *Trypanosoma cruzi* dynamics at the heart of  
731 Chagas disease. *Trends Parasitol* 32:899-911.
- 732 14. Sánchez-Valdéz FJ, Padilla A, Wang W, Orr D, Tarleton RL. 2018. Spontaneous  
733 dormancy protects *Trypanosoma cruzi* during extended drug exposure. *Elife*  
734 7:e34039.
- 735 15. Duarte JG, Nascimento RD, Martins PR, d'Ávila Reis D. 2017. An autopsy-based  
736 study of *Trypanosoma cruzi* persistence in organs of chronic chagasic patients and its  
737 relevance for transplantation. *Transpl Infect Dis* 19:e12783.
- 738 16. Hyland KV, Asfaw SH, Olson CL, Daniels MD, Engman DM. 2008. Bioluminescent  
739 imaging of *Trypanosoma cruzi* infection. *Int J Parasitol* 38:1391–1400.
- 740 17. Silberstein E, Serna C, Fragoso SP, Nagarkatti R, Debrabant A. 2018. A novel  
741 nanoluciferase-based system to monitor *Trypanosoma cruzi* infection in mice by  
742 bioluminescence imaging. *PLoS One* 13:e0195879.
- 743 18. Calvet CM, Choi JY, Thomas D, Suzuki B, Hirata K, Lostracco-Johnson S, de  
744 Mesquita LB, Nogueira A, Meuser-Batista M, Silva TA, Siqueira-Neto JL, Roush WR,  
745 de Souza Pereira MC, McKerrow JH, Podust LM. 2017. 4-aminopyridyl-based lead  
746 compounds targeting CYP51 prevent spontaneous parasite relapse in a chronic model

- 747 and improve cardiac pathology in an acute model of *Trypanosoma cruzi* infection.  
748 PLoS Negl Trop Dis 11:e0006132.
- 749 19. Branchini BR, Ablamsky DM, Davis AL, Southworth TL, Butler B, Fan F, Jathoul  
750 AP, Pule MA. 2010. Red-emitting luciferases for bioluminescence reporter and  
751 imaging applications. Anal Biochem 396:290-297.
- 752 20. Lewis MD, Fortes Francisco A, Taylor MC, Burrell-Saward H, McLatchie AP, Miles  
753 MA, Kelly JM. 2014. Bioluminescence imaging of chronic *Trypanosoma cruzi*  
754 infections reveals tissue-specific parasite dynamics and heart disease in the absence  
755 of locally persistent infection. Cell Microbiol 16:1285-1300.
- 756 21. Lewis MD, Fortes Francisco A, Taylor MC, Kelly JM. 2015. A new experimental  
757 model for assessing drug efficacy against *Trypanosoma cruzi* infection based on  
758 highly sensitive *in vivo* imaging. J Biomolec Screen 20:36-43.
- 759 22. Lewis MD, Fortes Francisco A, Taylor MC, Jayawardhana S, Kelly JM. 2016. Host  
760 and parasite genetics shape a link between *Trypanosoma cruzi* infection dynamics  
761 and chronic cardiomyopathy. Cell Microbiol 18:1429-1443.
- 762 23. Francisco AF, Lewis MD, Jayawardhana S, Taylor MC, Chatelain E, Kelly JM.  
763 2015. The limited ability of posaconazole to cure both acute and chronic *Trypanosoma*  
764 *cruzi* infections revealed by highly sensitive *in vivo* imaging. Antimicrob Agents  
765 Chemother 59:4653-4661.
- 766 24. Francisco AF, Jayawardhana S, Taylor MC, Lewis MD, Kelly JM. 2018. Assessing  
767 the effectiveness of curative benznidazole treatment in preventing chronic cardiac  
768 pathology in experimental models of Chagas disease. Antimicrob Agents Chemother  
769 62:e00832-18.
- 770 25. Costa FC, Francisco AF, Jayawardhana S, Calderano SG, Lewis MD, Olmo F,  
771 Beneke T, Gluenz E, Sunter J, Dean S, Kelly JM, Taylor MC. 2018. Expanding the

772 toolbox for *Trypanosoma cruzi*: A parasite line incorporating a bioluminescence-  
773 fluorescence dual reporter and streamlined CRISPR/Cas9 functionality for rapid *in vivo*  
774 localisation and phenotyping. PLoS Negl Trop Dis 12:e0006388.

775 26. Taylor MC, Ward A, Olmo F, Jayawardhana S, Francisco AF, Lewis MD, Kelly JM.  
776 2020. Intracellular DNA replication and differentiation of *Trypanosoma cruzi* is  
777 asynchronous within individual host cells *in vivo* at all stages of infection. PLoS Negl  
778 Trop Dis 14:e0008007.

779 27. Francisco AF, Jayawardhana S, Lewis MD, White KL, Shackleford DM, Chen G,  
780 Saunders J, Osuna-Cabello M, Read KD, Charman SA, Chatelain E, Kelly JM. 2016.  
781 Nitroheterocyclic drugs cure experimental *Trypanosoma cruzi* infections more  
782 effectively in the chronic stage than in the acute stage. Sci Rep 6:35351.

783 28. Mann GS, Francisco AF, Jayawardhana S, Taylor MC, Lewis MD, Olmo F, López-  
784 Camacho C, Oliveira de Freitas E, Leoratti FMS, Reyes-Sandoval A, Kelly JM. 2020.  
785 Drug-cured experimental *Trypanosoma cruzi* infections confer long-lasting and cross-  
786 strain protection. PLoS Negl Trop Dis 14:e0007717.

787 29. Molina I, Gómez i Prat J, Salvador F, Treviño B, Sulleiro E, Serre N, Pou D, Roure  
788 S, Cabezos J, Valerio L, Blanco-Grau A, Sánchez-Montalvá A, Vidal X, Pahissa A.  
789 2014. Randomized trial of posaconazole and benznidazole for chronic Chagas  
790 disease. N Eng J Med 370:1899-1908.

791 30. Morillo CA, Marin-Neto JA, Avezum A, Sosa-Estani S, Rassi A Jr, Rosas F, Villena  
792 E, Quiroz R, Bonilla R, Britto C, Guhl F, Velazquez E, Bonilla L, Meeks B, Rao-Melacini  
793 P, Pogue J, Mattos A, Lazdins J, Rassi A, Connolly SJ, Yusuf S; BENEFIT  
794 Investigators. 2015. Randomized trial of benznidazole for chronic Chagas'  
795 cardiomyopathy. N Eng J Med 373:1295-1306.



- 796 31. Lewis MD, Francisco AF, Jayawardhana S, Langston H, Taylor MC, Kelly JM.  
797 2018. Imaging the development of chronic Chagas disease after oral transmission. *Sci*  
798 *Rep* 8:11292.
- 799 32. Weaver JD, Hoffman VJ, Roffe E, Murphy PM. 2019. Low-level parasite  
800 persistence drives vasculitis and myositis in skeletal muscle of mice chronically  
801 infected with *Trypanosoma cruzi*. *Infect Immun* 87:e00081-19.
- 802 33. Capewell P, Cren-Travaillé C, Marchesi F, Johnston P, Clucas C, Benson RA,  
803 Gorman TA, Calvo-Alvarez E, Cruzols A, Jouvion G, Jamonneau V, Weir W,  
804 Stevenson ML, O'Neill K, Cooper A, Swar NK, Bucheton B, Ngoyi DM, Garside P,  
805 Rotureau B, MacLeod A. 2016. The skin is a significant but overlooked anatomical  
806 reservoir for vector-borne African trypanosomes. *Elife* 5:e17716.
- 807 34. Caljon G, Van Reet N, De Trez C, Vermeersch M, Pérez-Morga D, Van Den  
808 Abbeele J. 2016. The dermis as a delivery site of *Trypanosoma brucei* for tsetse flies.  
809 *PLoS Pathog* 12:e1005744.
- 810 35. Hemmige V, Tanowitz H, Sethi A. 2012. *Trypanosoma cruzi* infection: a review  
811 with emphasis on cutaneous manifestations. *Int J Dermatol* 51:501-508.
- 812 36. Gallerano V, Consigli J, Pereyra S, Gómez Zanni S, Danielo C, Gallerano RH,  
813 Guidi A. 2007. Chagas' disease reactivation with skin symptoms in a patient with  
814 kidney transplant. *Int J Dermatol* 46:607-610.
- 815 37. Riganti J, Guzzi Maqueda M, Baztan Piñero MC, Volonteri VI, Galimberti RL. 2012.  
816 Reactivation of Chagas' disease: cutaneous manifestations in two immunosuppressed  
817 patients. *Int J Dermatol* 51:829-834.
- 818 38. Trindade S, Rijo-Ferreira F, Carvalho T, Pinto-Neves D, Guegan F, Aresta-Branco  
819 F, Bento F, Young SA, Pinto A, Van Den Abbeele J, Ribeiro RM, Dias S, Smith TK,

820 Figueiredo LM. 2016. *Trypanosoma brucei* parasites occupy and functionally adapt to  
821 the adipose tissue in mice. *Cell Host Microbe* 19:837–848.

822 39. Isola EL, Lammel EM, González Cappa SM. 1986. *Trypanosoma cruzi*:  
823 differentiation after interaction of epimastigotes and *Triatoma infestans* intestinal  
824 homogenate. *Exp Parasitol* 62:329-335.

825 40. Taylor MC, Francisco AF, Jayawardhana S, Mann GS, Ward AI, Olmo F, Lewis  
826 MD, Kelly JM. 2019. Exploiting genetically modified dual-reporter strains to monitor  
827 experimental *Trypanosoma cruzi* Infections and host-parasite interactions. *Methods*  
828 *Mol Biol* 1955:147-163.

829

830

831

832

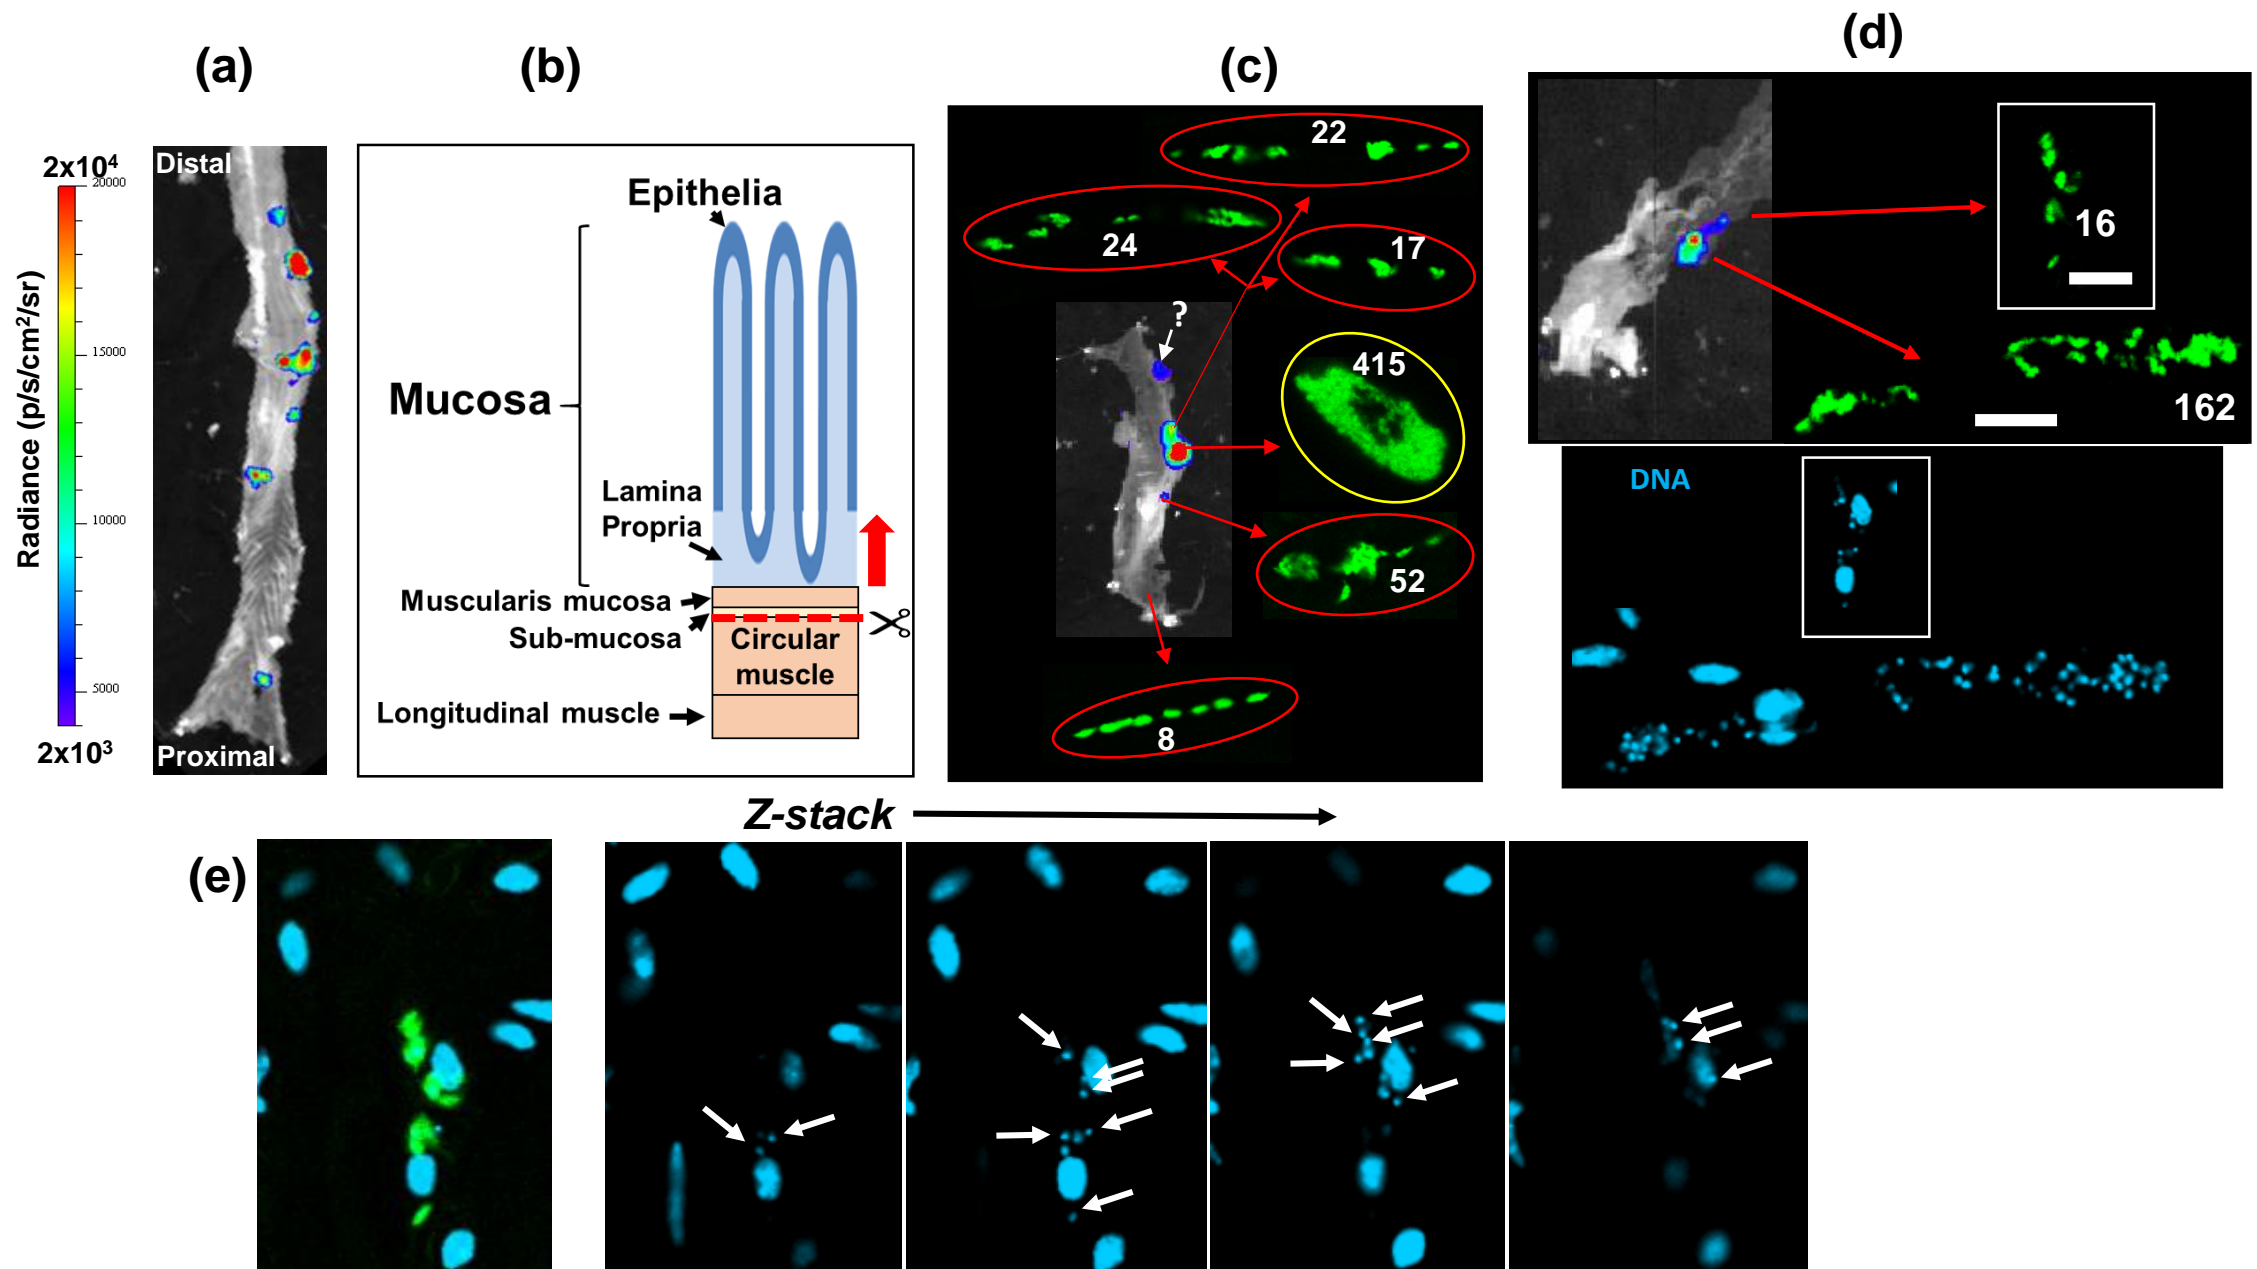

FIG 1

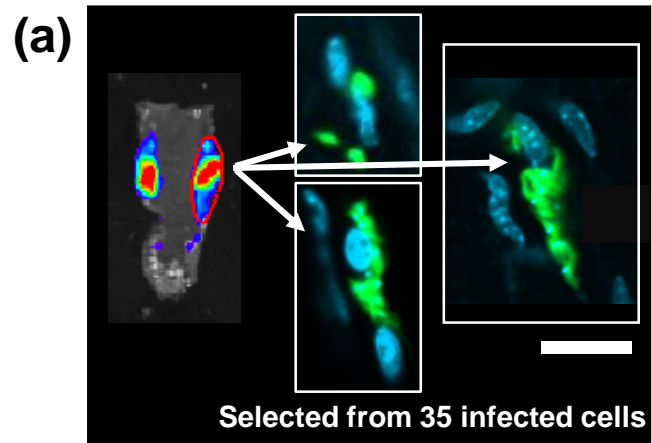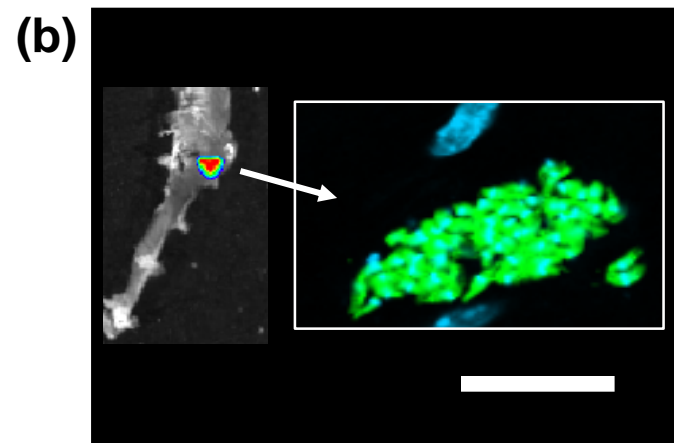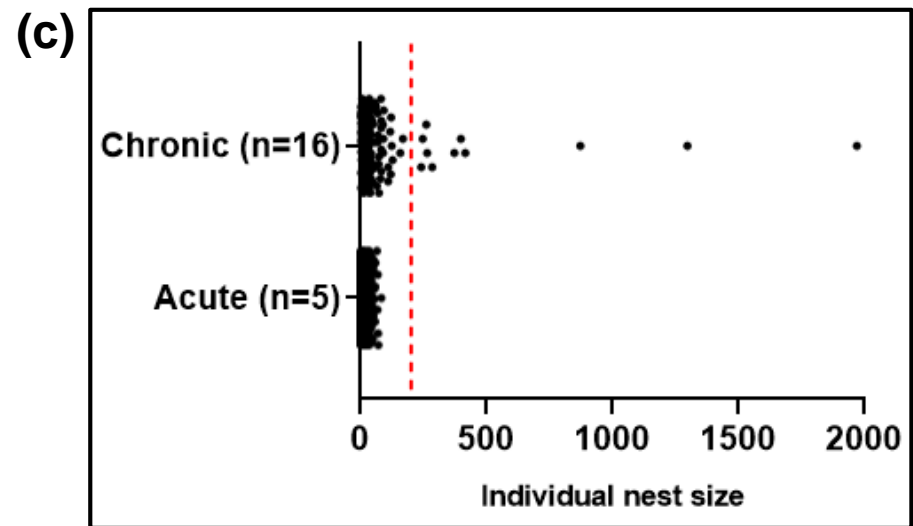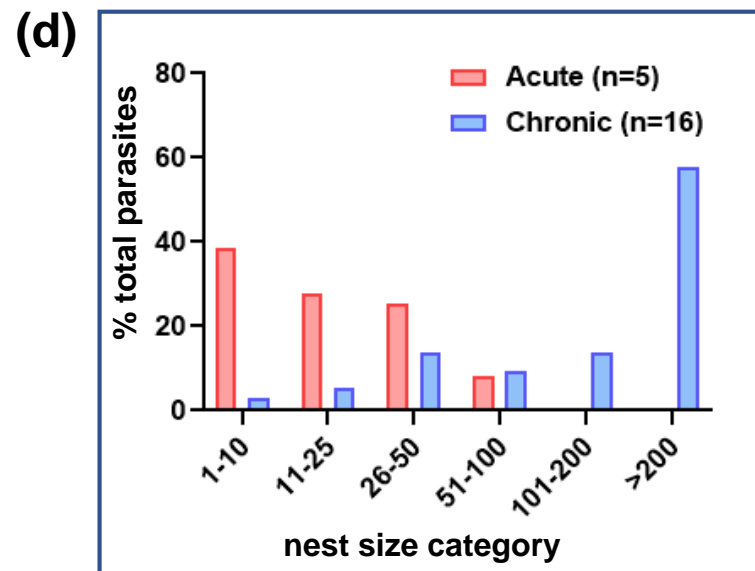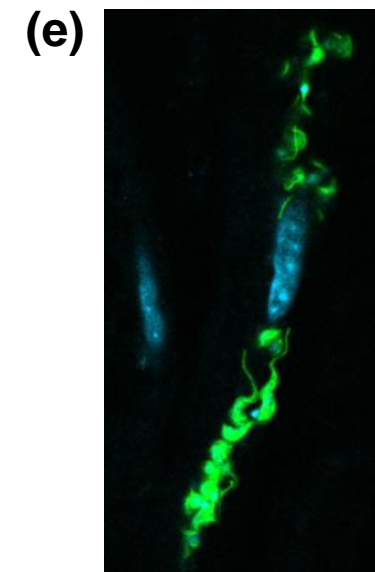

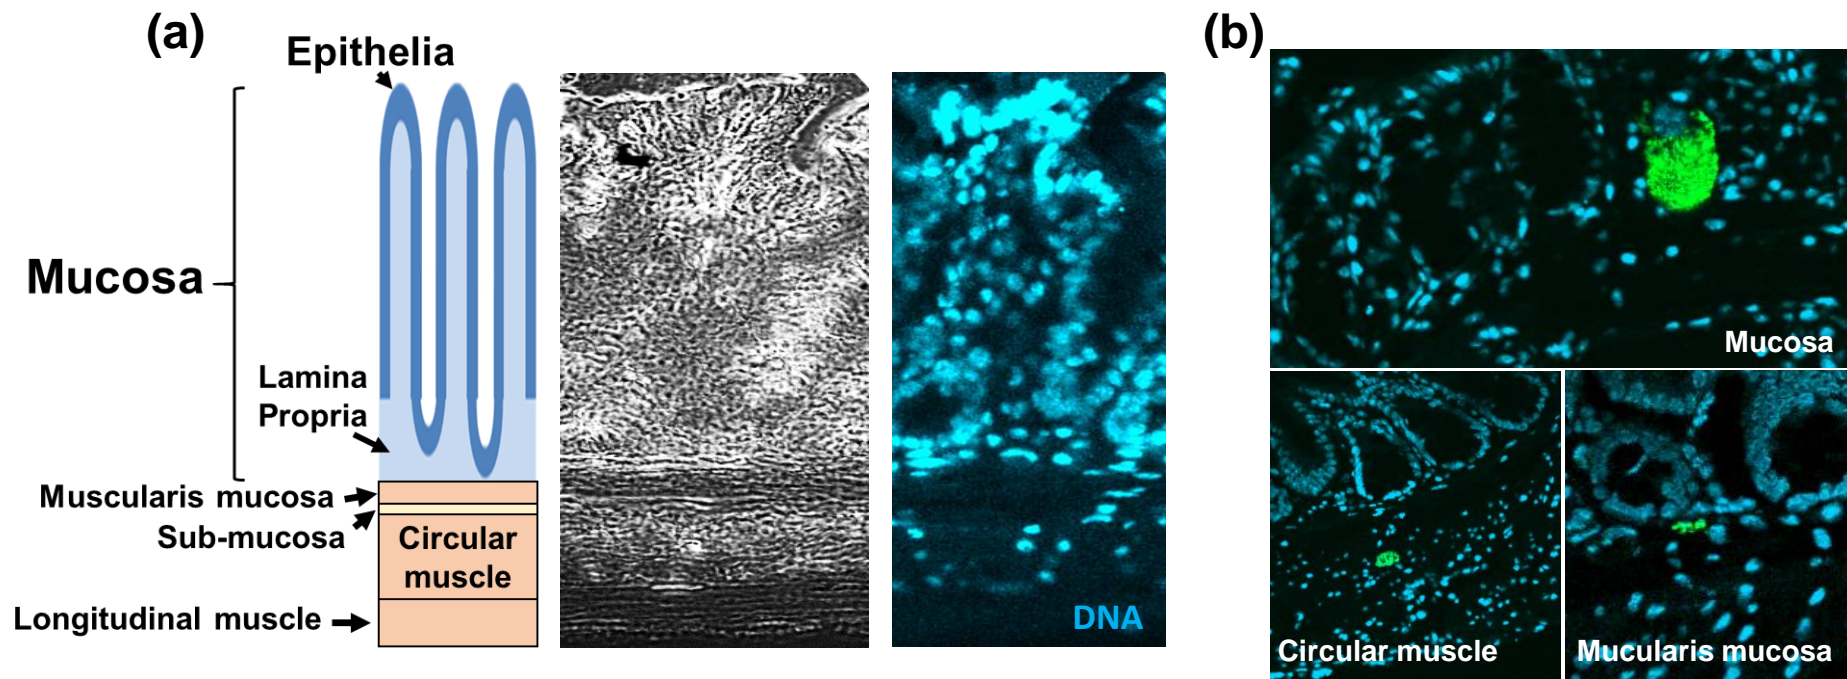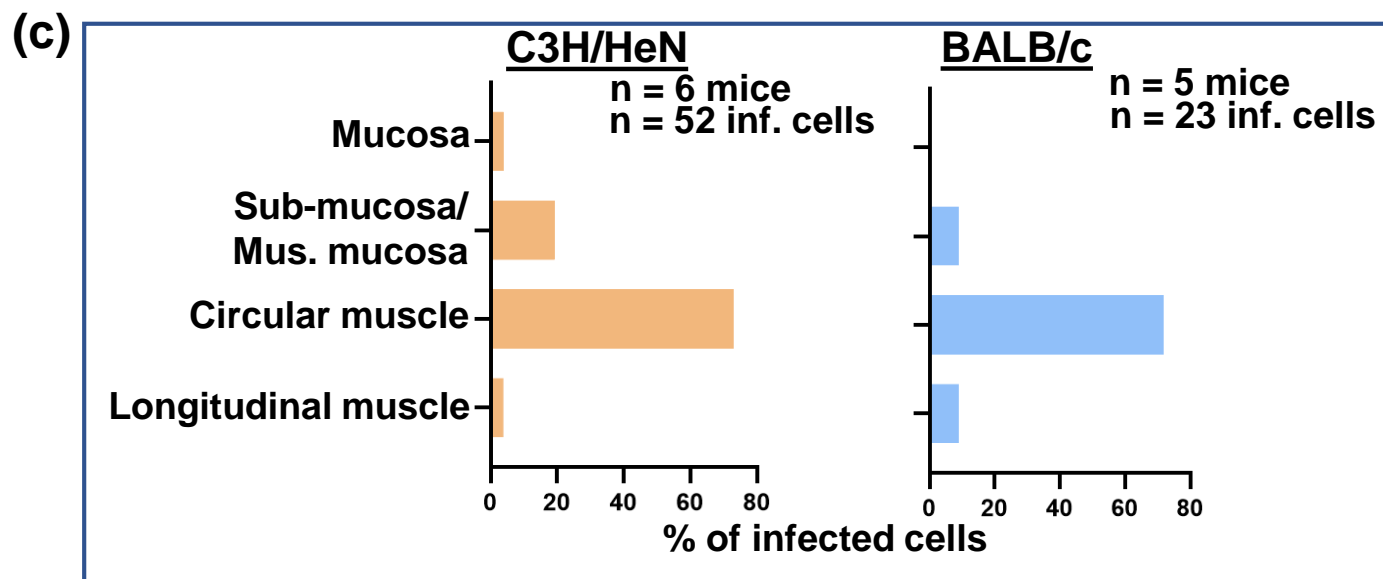

FIG 3

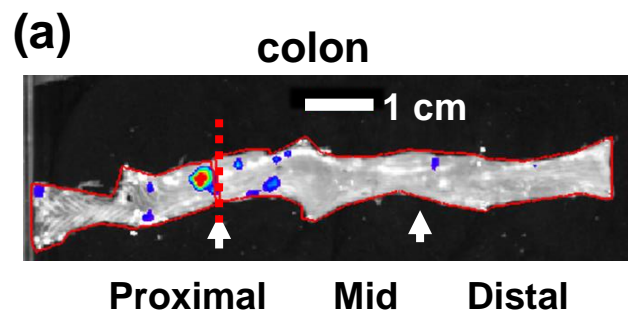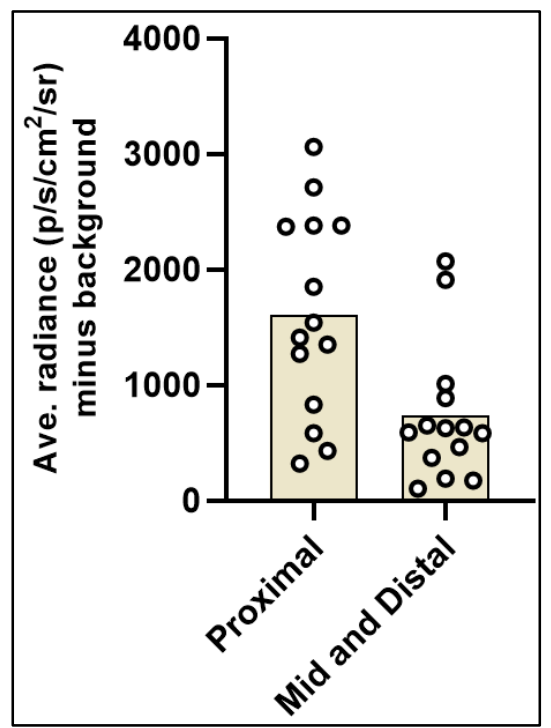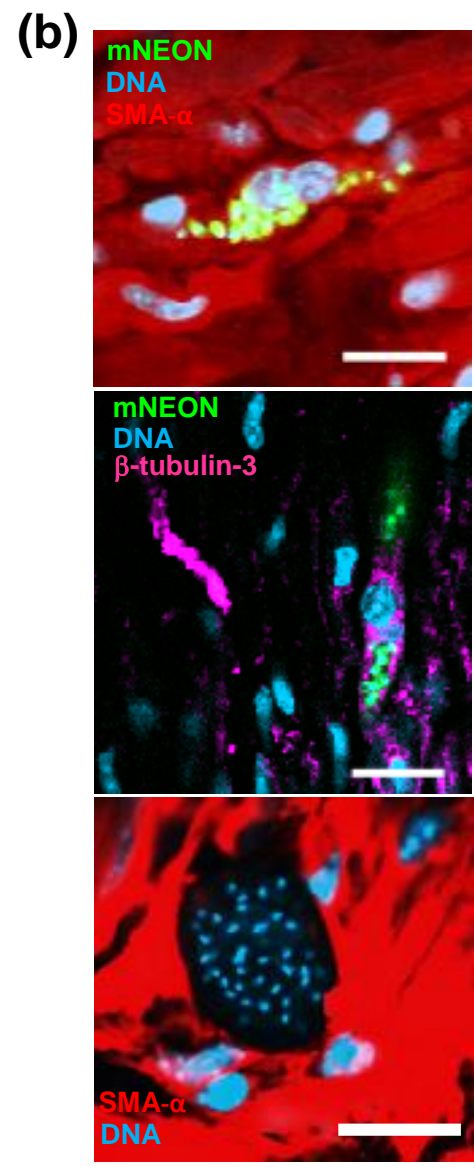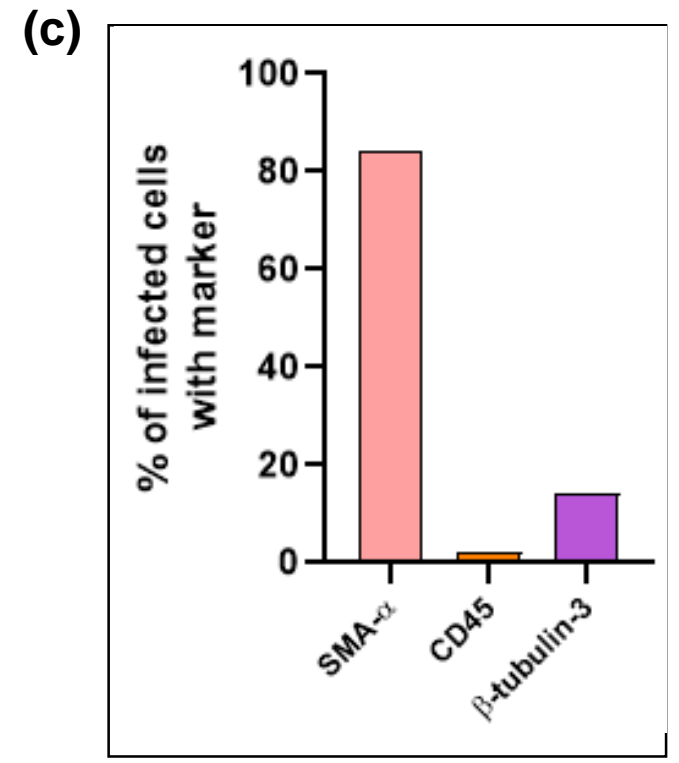

FIG 4

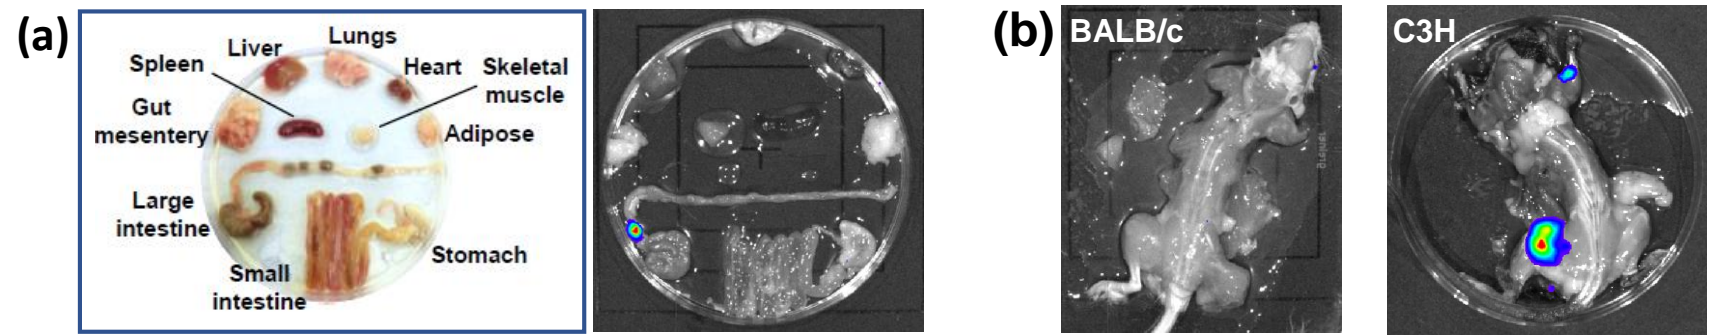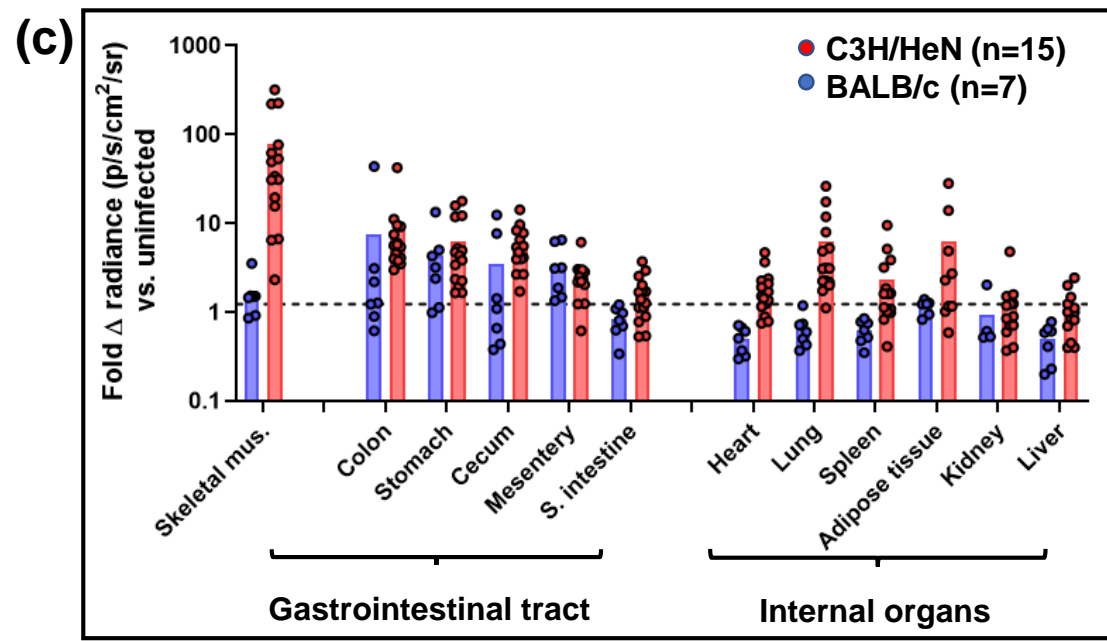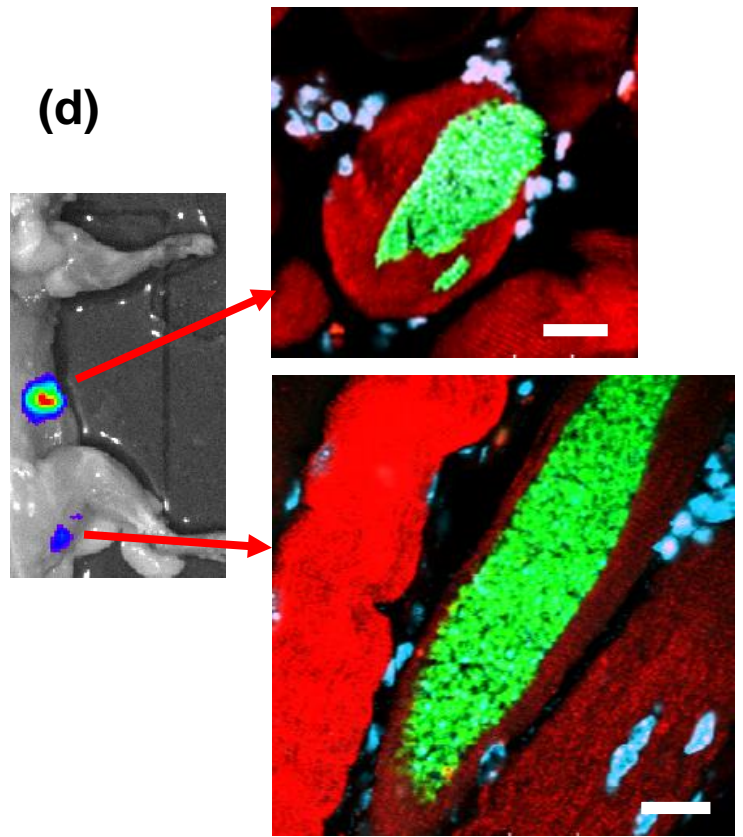

FIG 5

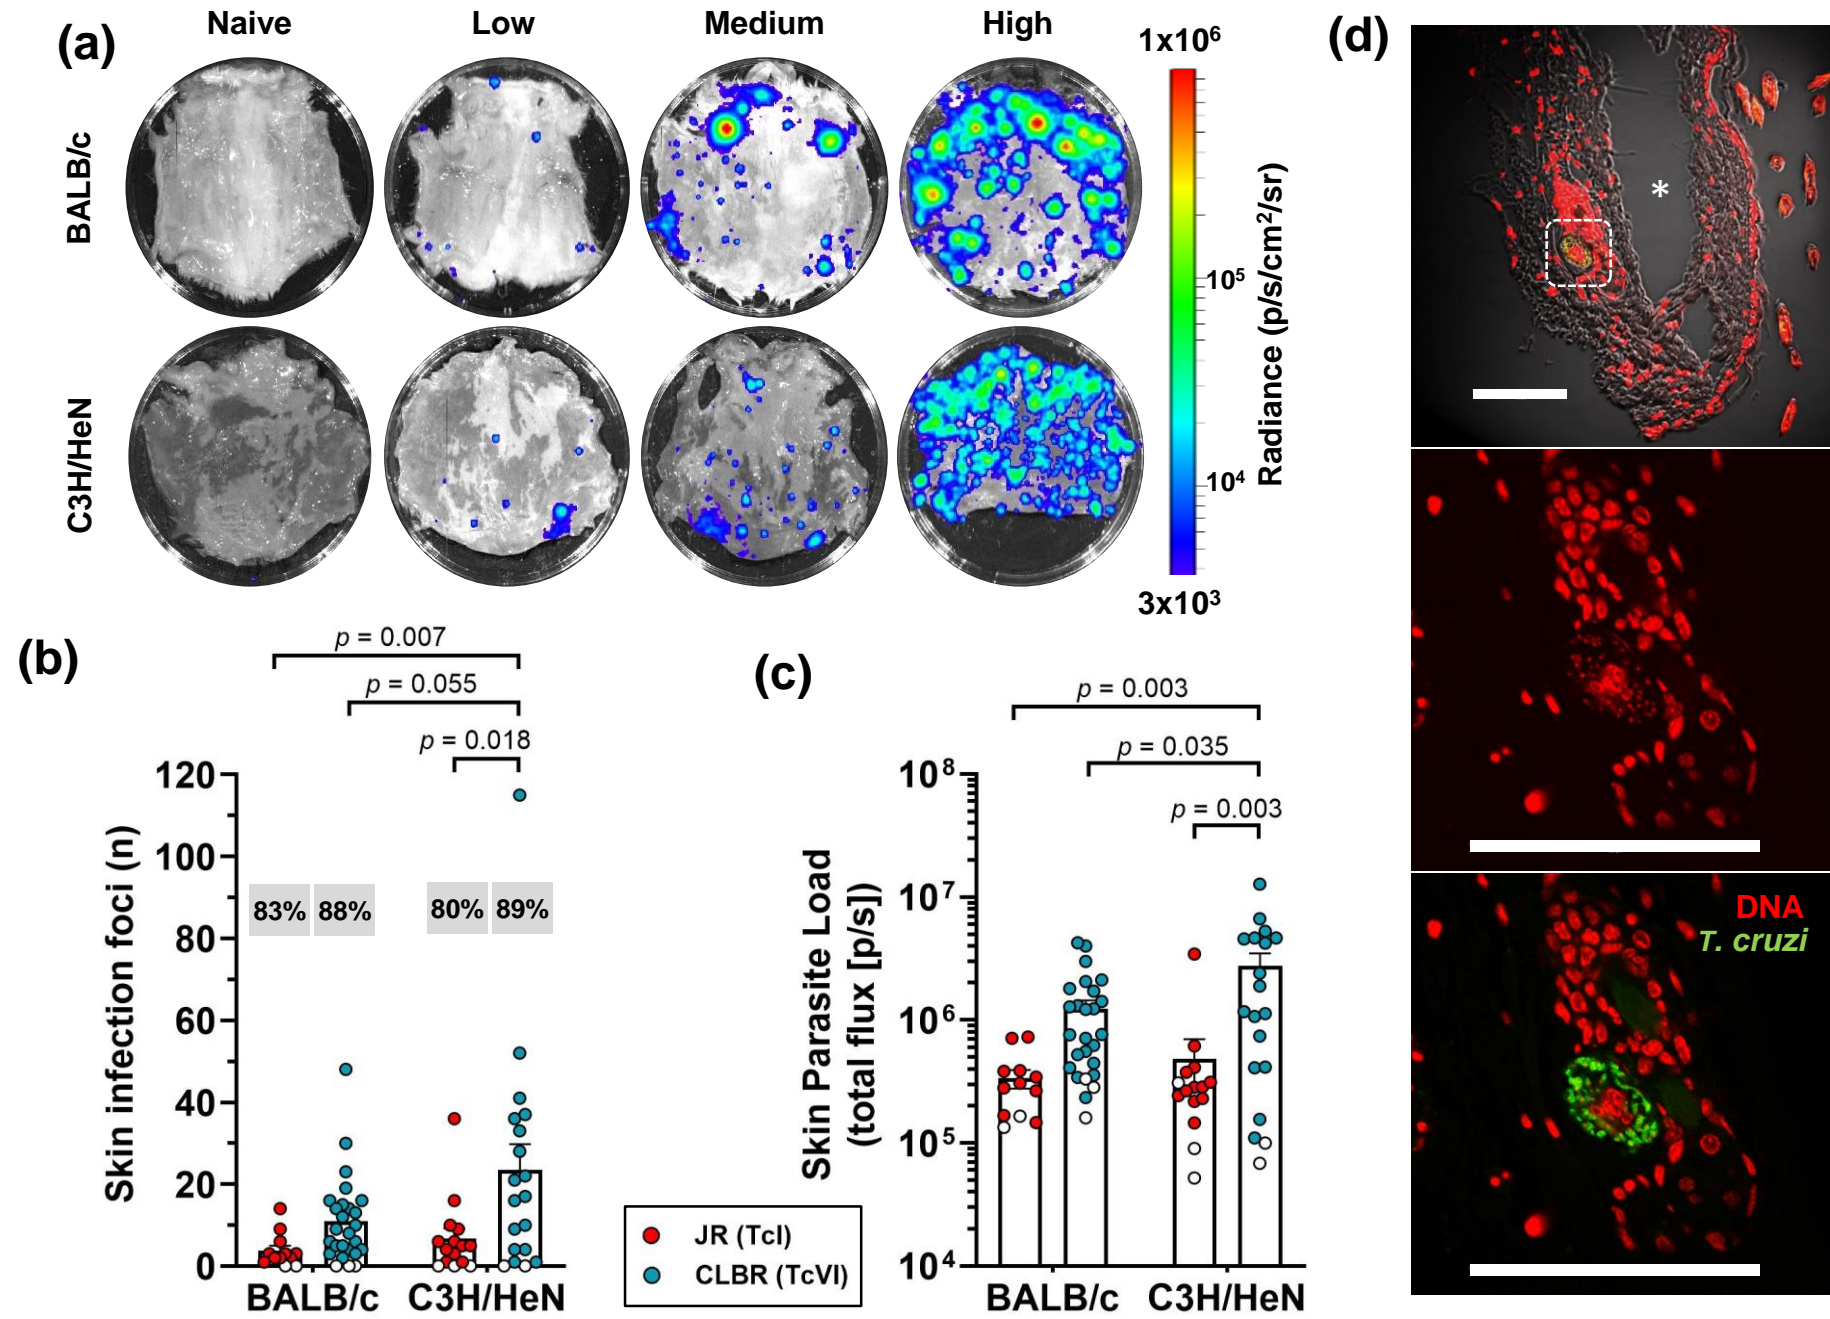

FIG 6
